# Supplementary material
Source: HighWire-hosted journal article supplement (doi:10.1101/rna.048918.114)
Supplement: SuppTable1Legend.docx [file SuppTable1Legend.docx]

Supplemental Table 1: Cleavage intensity following enzymatic-probing by RNase T1 of nucleotides in naked 16S rRNA, Intermediate 1 and Intermediate 2 relative to *in vitro* formed SSUs (SSUs=1). The helix number and nucleotide (and corresponding *E. coli* nucleotide number when applicable) of each cleavage are indicated. The change in cleavage intensity between naked 16S rRNA and Intermediate 1, Intermediate 1 and Intermediate 2 as well as Intermediate 2 and *in vitro* formed SSUs are labeled as No Change (NC), if less than 2-fold difference (gray), Protection (P) (blue) or Enhancement (E) (orange). A: *E. coli* B. *G. kaustophilus* C: *T. thermophilus*
